# Supplementary material for: Does major pathological response after neoadjuvant Immunotherapy in resectable nonsmall-cell lung cancers predict prognosis? A systematic review and meta-analysis
Source: PubMed Central journal article supplement (PMC10498860; doi:10.1097/js9.0000000000000496), 2023-05-26
Supplement: js9-109-2794-s005.pdf [file js9-109-2794-s005.pdf]

**PRISMA 2020 flow diagram for new systematic reviews which included searches of databases and registers only**

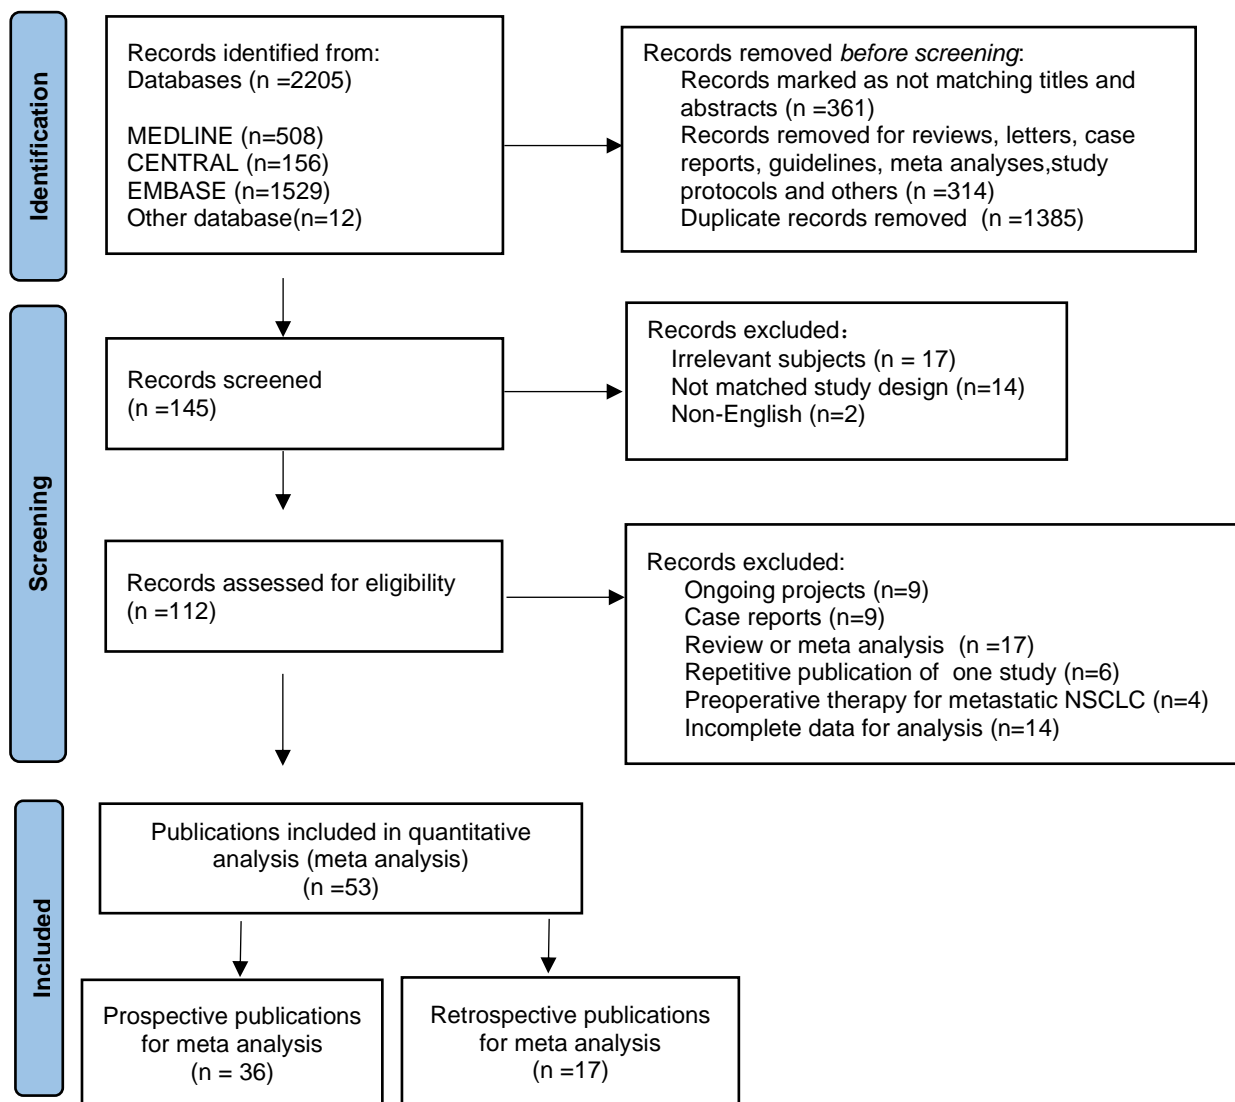

Fig.1 Flowchart of study selection.

From: Page MJ, McKenzie JE, Bossuyt PM, Boutron I, Hoffmann TC, Mulrow CD, et al. The PRISMA 2020 statement: an updated guideline for reporting systematic reviews. *BMJ* 2021;372:n71. doi: 10.1136/bmj.n71
