# Supplementary material for: Does major pathological response after neoadjuvant Immunotherapy in resectable nonsmall-cell lung cancers predict prognosis? A systematic review and meta-analysis
Source: PubMed Central journal article supplement (PMC10498860; doi:10.1097/js9.0000000000000496), 2023-05-26

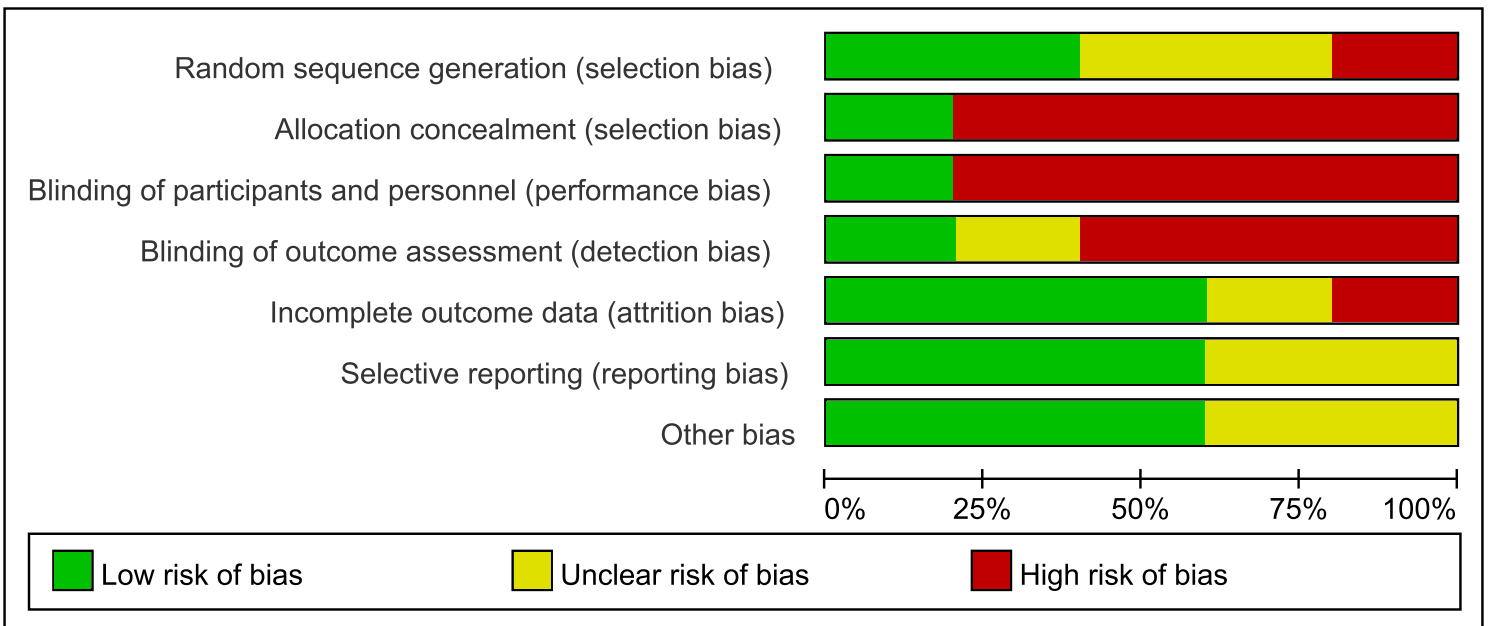

Supplement: js9-109-2794-s008.pdf [file js9-109-2794-s008.pdf]
